# Supplementary material for: Genomic surveillance of enterovirus associated with aseptic meningitis cases in southern Spain, 2015–2018
Source: PubMed Central journal article supplement (PMC8564535; doi:10.1038/s41598-021-01053-4), 2021-11-02
Supplement: 41598_2021_1053_MOESM4_ESM.pdf [file 41598_2021_1053_MOESM4_ESM.pdf]

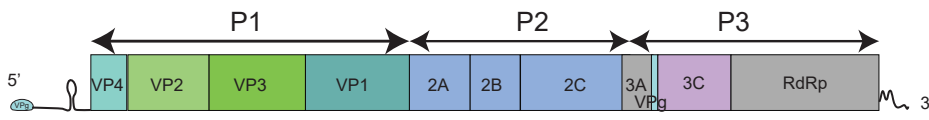

A)

Query: E11/Spain\_LCR484/2015

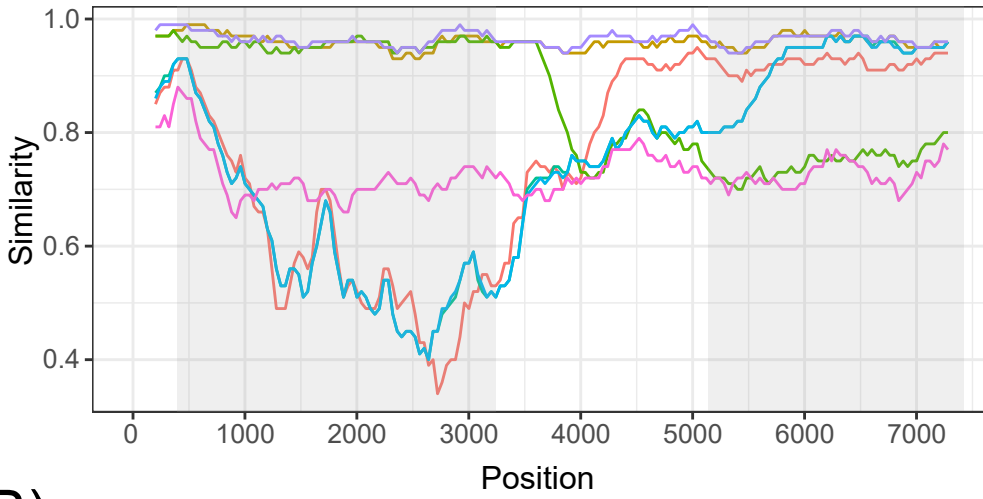

Sample

- MN749159\_USA\_2013
- KX527626\_E11\_Italy\_2013
- LCR1106\_1059\_E11\_Spain\_2018
- MG845887\_CVB1\_Switzerland\_2013
- LCR365\_E6\_138\_Spain\_2015
- LCR255\_E6\_Spain\_2015
- X80059\_E11\_strain\_Gregory

B)

Query: E30/Spain\_LCR520/2018

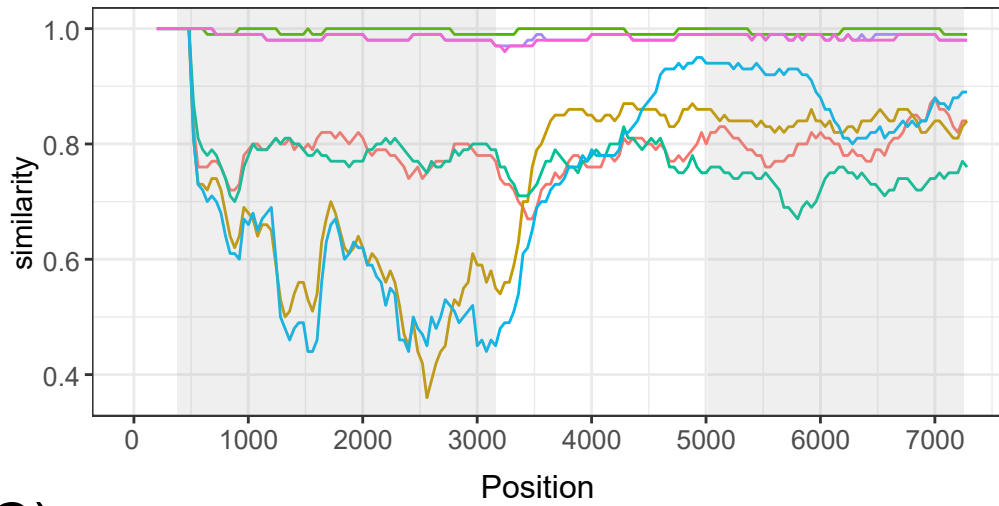

Sample

- LCR519\_E30\_Spain\_2018
- MK815083\_E30\_Netherlands\_2017
- MK815082\_E30\_Netherlands\_2017
- MF678304\_CVB3\_Australia\_2012
- KY262576\_CVB6\_China\_2000
- AF311938\_E30\_strain\_Bastianni
- LCR675\_E30\_Spain\_2017

C)

Query: E30/Spain\_LCR675/2017

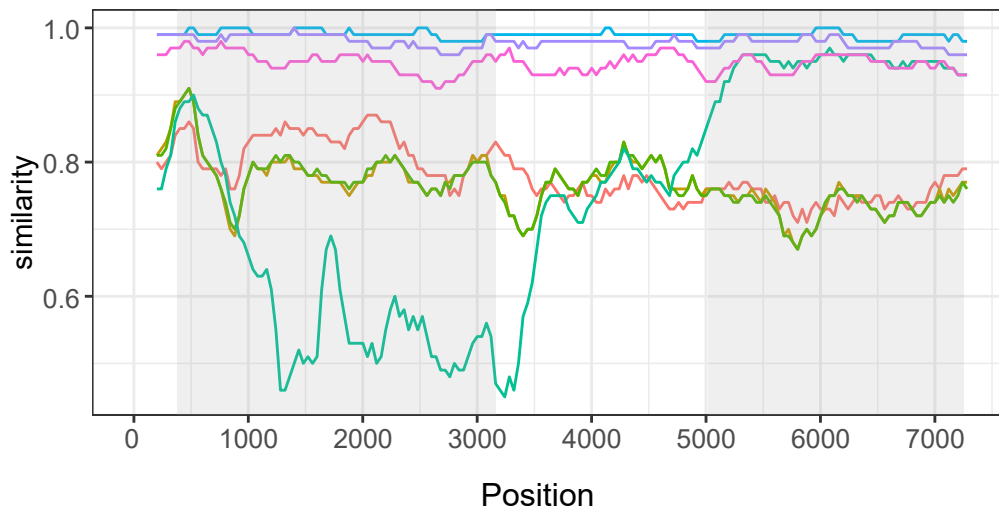

Sample

- MH484073\_E30\_Spain\_2016
- MH484075\_E30\_Spain\_2016
- MK815080\_E30\_Netherlands\_2017
- MG451810\_E7\_UK\_2017
- AF311938\_E30\_strain\_Bastianni
- LCR519\_E30\_Spain\_2018
- LCR520\_E30\_Spain\_2018

D)

Query: E30/Spain\_LCR265/2016

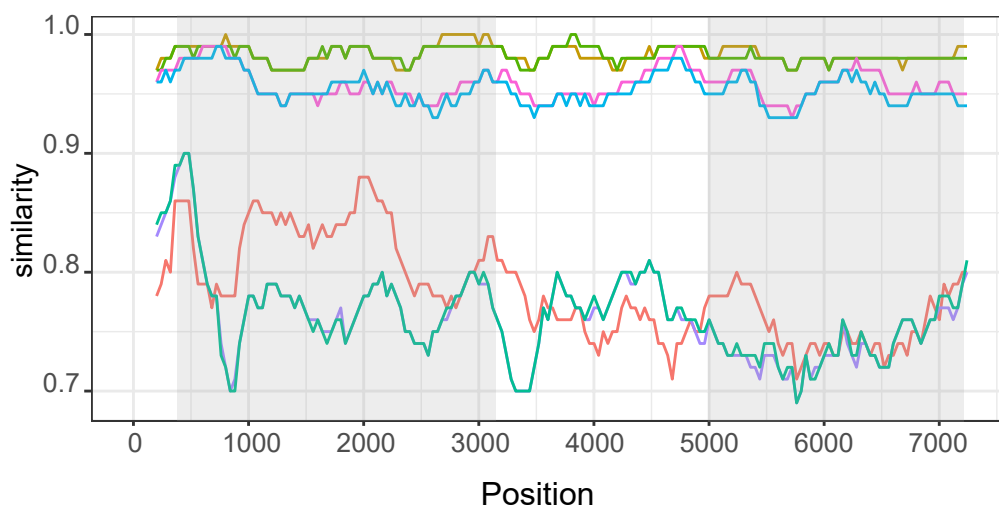

Sample

- MK815079\_E30\_Netherlands\_2017
- MK815074\_E30\_Netherlands\_2016
- LCR675\_E30\_Spain\_2017
- D\_MH484073\_E30\_Spain\_2016
- A\_AF311938\_Bastianni
- F\_LCR520\_E30\_Spain\_2018
- LCR519\_E30\_Spain\_2018
