# Supplementary material for: Genomic surveillance of enterovirus associated with aseptic meningitis cases in southern Spain, 2015–2018
Source: PubMed Central journal article supplement (PMC8564535; doi:10.1038/s41598-021-01053-4), 2021-11-02
Supplement: 41598_2021_1053_MOESM5_ESM.pdf [file 41598_2021_1053_MOESM5_ESM.pdf]

A)

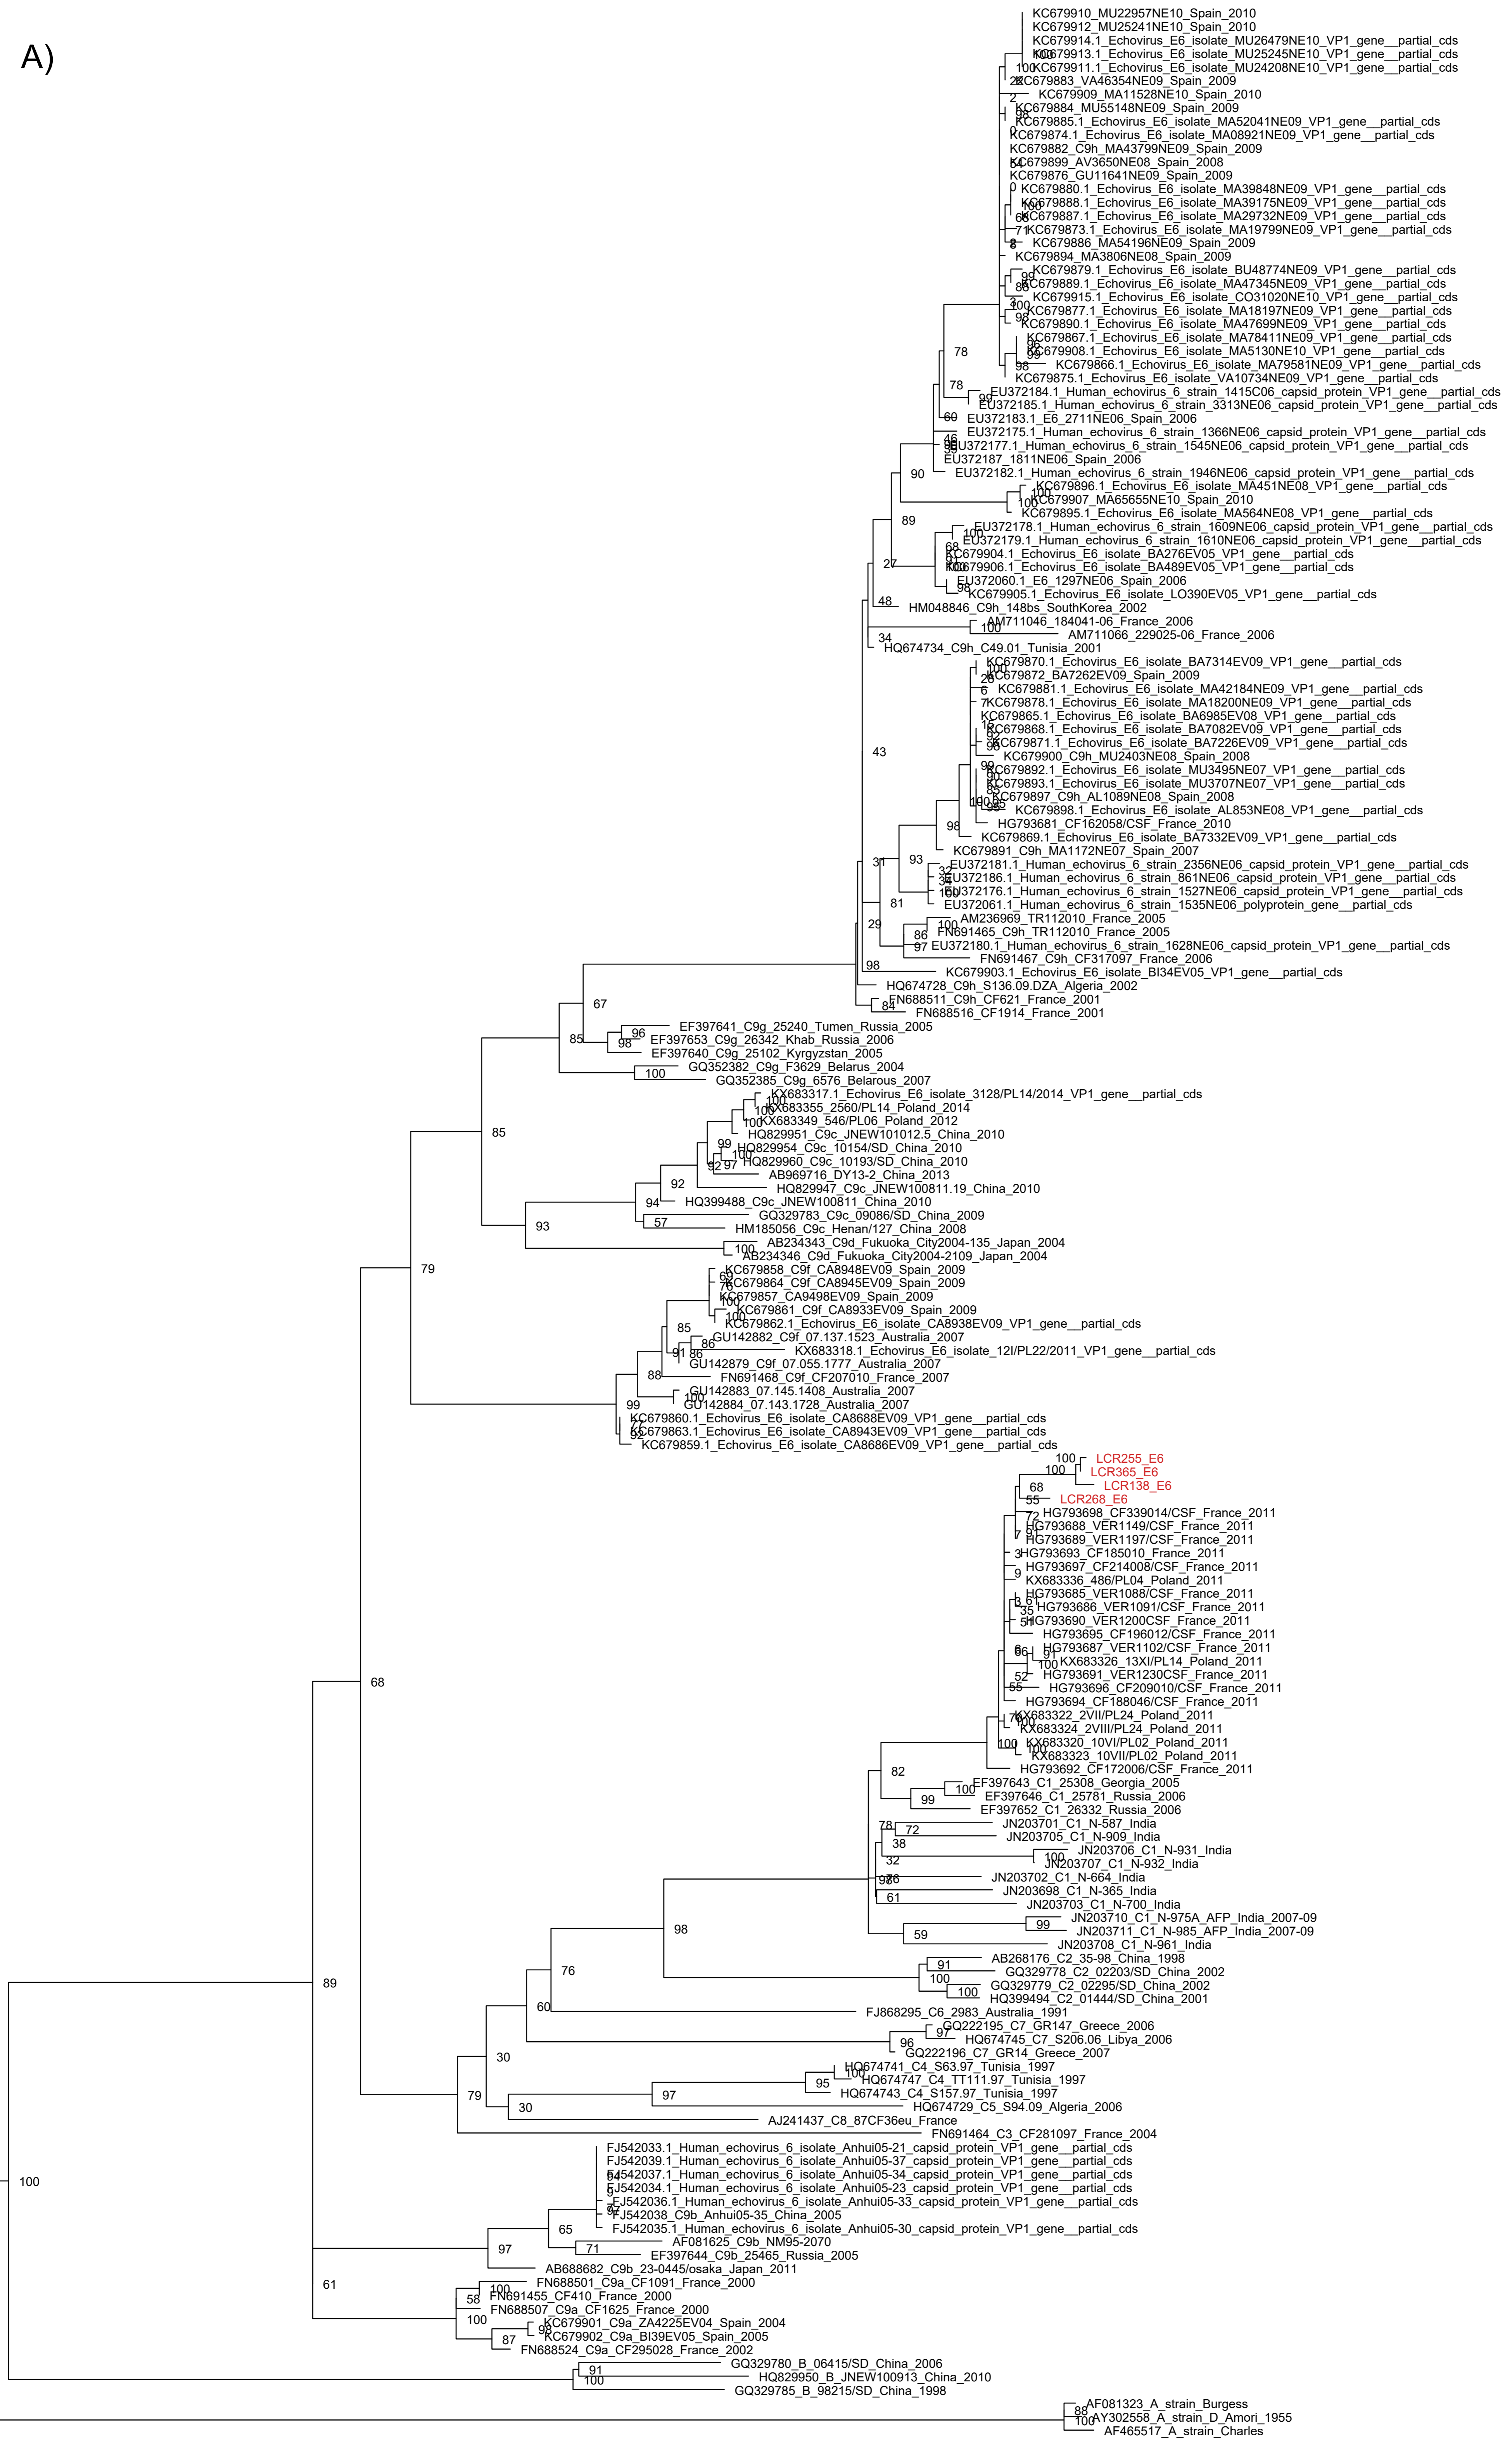

0.04
